# Supplementary material for: Identification of Quantitative Trait Loci Associated With Iron Deficiency Tolerance in Maize
Source: Front Plant Sci. 2022 Apr 14;13:805247. doi: 10.3389/fpls.2022.805247 (PMC9048261; doi:10.3389/fpls.2022.805247)
Supplement: Supplementary file 2 [file Data_Sheet_2.xlsx]

## Sheet: Table S1
	TABLE S1 Primers of Quantitative Real-time PCR
	Gene name	Primer name	Sequence 5' to 3'
	ZmYS3	ZmYS3-F	TTCAGTCGCTTCAGTGGTTG
		ZmYS3-R	CGGGCCAACAATAAGACCTA
	ZmPYE	ZmPYE-F	GATCCCCCTCTTCCTCACTC
		ZmPYE-R	GAGGTGGTTTGGTCATTGCT
	ZmEIL3	ZmEIL3-F	TCACTGACCCAACCTCCTTC
		ZmEIL3-R	TCCGGTCAAGGAATCCATAG
	ZmMYB153	ZmMYB153-F	ACAGCTAACTGCCTGCCTGT
		ZmMYB153-R	CCGTGTTAGGTGATGCCTTT

## Sheet: Table S2
	TABLE S2 Kolmogorov-Smirnova test
	Trait	Fe-deficient treatment			Fe-sufficient treatment
	SPAD	Statistic	df	Sig.	Statistic	df	Sig.
		0.0627574	203	0.0556689	0.0377029	201	0.2
	PH	Statistic	df	Sig.	Statistic	df	Sig.
		0.0473222	203	0.2	0.052587	201	0.2
	RL	Statistic	df	Sig.	Statistic	df	Sig.
		0.034798	203	0.2	0.0514946	201	0.2
	SDW	Statistic	df	Sig.	Statistic	df	Sig.
		0.111931	202	1.85836e-06	0.0519881	201	0.2
	RDW	Statistic	df	Sig.	Statistic	df	Sig.
		0.105729	202	9.89287e-06	0.124582	201	4.79073e-08
	R/S	Statistic	df	Sig.	Statistic	df	Sig.
		0.988206	203	0.100407	0.0521581	201	0.2

## Sheet: Table S3
	TABLE S3 Information of the genes within the QTL-colocalization of qFe(III)-RL7-1 and qFe(III)-RDW7-1
	Gene ID	Position (bp) a	Annotation
	GRMZM2G335407	33978575-33979095	Unknown
	GRMZM2G042692	33992785-33994579	Heavy metal transport/detoxification superfamily protein
	GRMZM2G076542	34016751-34018472	Unknown
	GRMZM2G076484	34053532-34062718	DEAD-box ATP-dependent RNA helicase family protein
	GRMZM2G399877	34112904-34115736	Pentatricopeptide repeat (PPR) superfamily protein
	GRMZM2G128832	34112904-34115736	Unknown
	GRMZM2G002396	34348254-34349795	Unknown
	GRMZM2G151651	34420047-34422708	Transmembrane protein
	GRMZM2G162316	34495060-34503742	DNAJ heat shock N-terminal domain-containing protein
	GRMZM2G143253	34670289-34673689	Rho GTPase activating protein with PAK-box/P21-Rho-binding domain
	GRMZM2G096831	34895723-34898056	Alpha/beta-Hydrolases superfamily protein
	GRMZM2G051771	34973560-34977657	SPDS1 - Spermidine synthase 1
	GRMZM2G062453	34995142-34996000	Cyclin-B1-3
	GRMZM2G092129	35161934-35176709	Calcium-dependent lipid-binding (CaLB domain) family protein
	GRMZM2G178140	35363659-35364287	Receptor-like protein kinase-related family protein
	GRMZM2G109252	35628238-35631169	Homeobox-leucine zipper family protein / lipid-binding START domain-containing protein
	GRMZM2G108894	35673623-35675327	CHL1 - Chalcone synthase 1
	GRMZM2G008263	35887579-35894900	GBSS1 - Granule-bound starch synthase 1
	GRMZM2G032699	36023080-36027226	P-loop containing nucleoside triphosphate hydrolases superfamily protein
	GRMZM2G032944	36095675-36099632	Methyltransferase family protein
	GRMZM2G320949	36095675-36099632	Encodes an Atg8-interacting protein that is partially associated with the ER
	GRMZM2G157379	36554214-36556013	BTB/POZ domain with WD40/YVTN repeat-like protein
	GRMZM2G141941	36615954-36619512	Unknown
	GRMZM2G139712	37202388-37256449	Myosin family protein with Dil domain
	AC204070.3_FG004	37202388-37256449	P-loop containing nucleoside triphosphate hydrolases superfamily protein
	GRMZM2G364851	37202388-37256449	Myosin 2 - Encodes a member of the type XI myosin protein family
	GRMZM2G154747	37736078-37737449	AWPM-19-like family protein
	GRMZM2G153683	37859010-37861985	Soluble N-ethylmaleimide-sensitive factor adaptor protein 33
	GRMZM2G025231	38018973-38024705	Cesa7 - cellulose synthase 7
	GRMZM2G071877	38850711-38854207	Protein kinase superfamily protein
	GRMZM2G034288	39230146..39243303	SU(VAR)3-9 homolog 2
	GRMZM2G140394	39413068-39417587	Ankyrin repeat family protein
	GRMZM2G115957	39649848-39662799	Tetratricopeptide repeat (TPR)-like superfamily protein
	GRMZM2G152732	40332323-40340429	TLD-domain containing nucleolar protein
	GRMZM2G471269	40372224-40378230	Serine carboxypeptidase 1
	GRMZM2G162409	40658579-40665122	GLK15 - G2-like-transcription factor 15
	GRMZM2G427672	40786739-40797896	RNA-binding KH domain-containing protein
	GRMZM2G063806	41272876-41279603	COP1-interacting protein-related
	GRMZM2G133396	41486681-41492349	ZmXBAT - E3 ubiquitin-protein ligase
	GRMZM2G022014	41540041-41542195	Unknown
	GRMZM2G146463	41730561-41734099	Alpha-galactosidase 1
	GRMZM2G146331	41734934..41745380	DNA directed RNA polymerase 7 kDa subunit
	GRMZM2G173777	42356910..42373012	Suppressor of abi3-5
	GRMZM2G160351	42530874-42533448	Zinc-binding ribosomal protein family protein
	GRMZM2G014914	42614221-42617867	PIP2E - Plasma membrane intrinsic protein 2
	GRMZM2G047368	42734578-42736049	PIP2F - Plasma membrane intrinsic protein 2
	GRMZM2G069676	42940009-43002780	Phosphoglucosamine mutase family protein
	GRMZM2G173923	43404587-43435492	CAF1 - CRS2 associated factor 1
	GRMZM2G044720	43503520-43506471	ORMDL family protein
	GRMZM5G885473	43677297-43678486	Prefoldin chaperone subunit family protein
	GRMZM2G177842	43917251-43920513	LUC7 N_terminus domain-containing protein
	GRMZM2G058128	44308966-44322839	XYL7 - Xylanase7
	GRMZM2G161587	44508983-44516002	Propionyl-CoA carboxylase
	GRMZM5G817551	44737236-44750078	Protein kinase superfamily protein
	GRMZM2G113668	44869182-44870922	Probable carbohydrate esterase
	GRMZM2G095562	45169846-45174650	Regulator of chromosome condensation (RCC1) family protein
	GRMZM2G396540	45317171-45320436	Fiber protein Fb34
	GRMZM2G125175	45512401-45516504	Thioesterase superfamily protein
	GRMZM2G139941	45600967-45607208	Zinc finger C3HC4 type (RING finger) family protein
	GRMZM2G477366	46000393-46002174	Rubredoxin-like superfamily protein
	GRMZM2G177475	46003318-46009407	Calcium-dependent protein kinase 21
	GRMZM5G857404	46214862-46253067	hemK methyltransferase - RHOMBOID protein pseudogene
	GRMZM2G336680	46318293..46320979	Unknown
	GRMZM2G054803	46506660-46508220	Undecaprenyl pyrophosphate synthetase family protein
	GRMZM2G086389	46662094-46668629	HAK18 - Potassium high-affinity transporter 18
	GRMZM5G893913	47333022-47337696	DCD (Development and Cell Death) domain protein
	GRMZM5G803610	47439934-47444503	Trimeric LpxA-like enzymes superfamily protein
	GRMZM5G868168	47470502-47474534	Non-intrinsic ABC protein 11
	GRMZM2G055255	47478972-47479775
	GRMZM2G011129	47592834-47596796	NBP1 - Nucleic acid binding protein 1
	GRMZM2G088870	47788152-47798277	Effector molecule of the plant-unique RAB5, ARA6
	GRMZM5G808737	47938945-47951630	Manganese-dependent ADP-ribose/CDP-alcohol diphosphatase
	GRMZM2G462062	48557175-48569404	Nuclear factor kappa-B-binding protein
	GRMZM2G131836	48894733-48896885	CNCR2 - Cinnamoyl CoA reductase 2
	GRMZM2G026218	49104779-49117584	P-loop containing nucleoside triphosphate hydrolases superfamily protein
	GRMZM2G515595	49222498-49225852	Ubiquitin family protein
	GRMZM2G067460	49781047-49783064	VFB1 - VIER F-box proteine 1
	GRMZM2G098606	50111756-50112708	Unknown
	GRMZM2G037743	50403342..50458438	Unknown
	GRMZM2G370797	50733550-50737177	ZIM38 - ZIM-transcription factor 38
	GRMZM2G061996	51269011-51275118	PRMT3 - Protein arginine methyltransferase 3
	GRMZM2G061702	51275315-51283636	Cyclase family protein
	GRMZM2G360688	51290781-51306627	Haloacid dehalogenase-like hydrolase (HAD) superfamily protein
	GRMZM2G061562	51312367-51318772	Protein LONGIFOLIA 1
	GRMZM2G053927	51682520-51723246	Sodium:hydrogen antiporter 1
	GRMZM2G074531	52209640-52224496	UNC-50 family protein
	GRMZM2G050550	52720492-52722060	MYB153 - MYB-transcription factor 153
	GRMZM2G048257	52962666-52965378	CXIP4 - CAX interacting protein 4
	GRMZM2G064594	53281916-53317060	Triacylglycerol lipase 1
	GRMZM2G064601	53317488-53320096	Cytochrome P450 family protein
	GRMZM2G027198	53575988-53577001	Uclacyanin 1
	GRMZM2G471779	53612511-53613631	Protein kinase superfamily protein, expressed in the peroxisome.
	GRMZM2G048553	53977846-53982641	P-loop containing nucleoside triphosphate hydrolases superfamily protein
	GRMZM2G089750	54394148..54395560	Unknown
	GRMZM2G032766	55719012-55720693	Calcium-dependent lipid-binding (CaLB domain) family protein
	GRMZM2G009940	56017876-56024283	NAD(P)-binding Rossmann-fold superfamily protein
	GRMZM2G051720	65333850..65370031	Nucleotidyltransferase family protein
	GRMZM2G110742	63858182-63859830	SBP4 (GRASSIUS) - SBP-transcription factor 4
	GRMZM2G023625	63324318-63335734	Homolog of histone chaperone HIRA
	GRMZM2G046317	63212758..63213604	Unknown
	GRMZM2G006965	59923390-59975491	RING/U-box superfamily protein
	GRMZM2G017528	59592820-59594772	Calcium ion-binding protein
	GRMZM2G446515	58448582-58454821	BZR4 - BZR-transcription factor 4
	GRMZM2G179424	71477579-71483111	Transducin family protein / WD-40 repeat family protein
	GRMZM2G480516	71236106-71242771	FAR4 - Fatty acid reductase 4
	GRMZM2G102851	70754766-70766777	Tetratricopeptide repeat (TPR)-like superfamily protein
	GRMZM2G071808	70151131-70156945	Unknown
	GRMZM2G312838	69475918..69477773	Calcium-dependent lipid-binding (CaLB domain) family protein
	GRMZM2G052105	66319203-66319900	Complex 1 protein, LYR family protein
	GRMZM2G142168	72242238-72249354	ENTH/VHS family protein
	AC204641.5_FG001	72642571-72647712	Galactose oxidase/kelch repeat superfamily protein
	GRMZM2G012654	72725789-72728016	CADTFR16 - CCAAT-DR1-transcription factor 16
	GRMZM2G312075	72729302-72738636	Sulfate adenylyltransferase subunit
	GRMZM2G009575	73562877-73567214	Single-stranded nucleic acid binding R3H protein
	GRMZM2G312110	74443395-74467781	Auxin transport protein (BIG)
	GRMZM2G160316	74970894-74992590	FRIGIDA-like protein
	GRMZM2G143870	75267818-75269744	RNA-binding (RRM/RBD/RNP motifs) family protein
	GRMZM2G086935	75319169-75321751	Mitochondrial import inner membrane translocase subunit Tim17/Tim22/Tim23 family protein
	GRMZM2G181415	76102463..76103736	Unknown
	GRMZM2G013794	76201393-76247511	SDG128 - Set domain gene128
	AC226230.2_FG001	77401823-77415627	Telomerase activating protein Est1
	GRMZM2G008108	77512307..77515699	Unknown
	GRMZM2G049155	78103852-78112840	RIF1 - R-interacting factor1
	GRMZM2G152638	78902647-78905738	O-Glycosyl hydrolases family 17 protein
	GRMZM2G032807	79172297-79173508	Heavy metal transport/detoxification superfamily protein
	GRMZM2G020156	79924461-79930169	Phototropic-responsive NPH3 family protein
	GRMZM2G135256	80326825-80366649	Hydrolases acting on ester bonds
	GRMZM5G893848	80598735-80599275	EDM2 - ENHANCED DOWNY MILDEW 2
	GRMZM2G388253	80598735-80599275	EDM2 - ENHANCED DOWNY MILDEW 2
	GRMZM2G470740	80639246-80641585	ELP1 - EDM2-like protein 1
	GRMZM2G031761	81396645-81409327	Tetratricopeptide repeat (TPR)-like superfamily protein
	GRMZM2G091643	81692351-81702315	AMP-dependent synthetase and ligase family protein
	GRMZM2G110548	82491352-82515307	EPL101 - Enhancer of polycomb-like protein 101
	GRMZM2G067747	82941331-82964364	NHX8 - Na+/H+ antiporter 8
	GRMZM2G099086	83171112-83173810	Phosphoglycerate mutase family protein
	GRMZM2G173756	83272769-83276487	UBC28 - ubiquitin-conjugating enzyme 28
	GRMZM2G092604	83362136-83366832	BRL1 - Bri1-like receptor kinase 1
	GRMZM2G399313	84302613-84306774	FKBP-like peptidyl-prolyl cis-trans isomerase family protein
	GRMZM2G136712	84461017-84474573	Aspartate kinase-homoserine dehydrogenase i
	GRMZM2G108737	84605038-84624692	Embryo defective 1381
	GRMZM2G324991	84875107-84877384	probable mitochondrial-processing peptidase subunit beta, mitochondrial
	GRMZM2G025340	85591821-85635677	P-loop containing nucleoside triphosphate hydrolases superfamily protein
	GRMZM2G131489	86258642-86270778	Chlorophyll A-B binding family protein
	GRMZM2G056501	86334136-86337652	Ubiquitin E2 variant 1D-4
	GRMZM2G119642	86381106..86382070	Unknown
	GRMZM2G103047	86463038-86467173	PPT2 - Plastid phosphate/phosphoenolpyruvate translocator 2
	GRMZM2G106950	86650576-86657063	IGPS1 - Indole-3-glycerolphosphate synthase 1
	GRMZM2G078754	86889413-86895945	Transducin/WD40 repeat-like superfamily protein
	GRMZM2G001114	86973683-86983058	Zinc finger (C3HC4-type RING finger) family protein
	a The position refers to the B73 reference sequence Version 5.

## Sheet: Table S4
.	TABLE S4 Information of the genes within the QTL-colocalization of qFe(III)-PH3-1 and qFe(II)-PH3-1, qFe(II)-SDW3-1, qFe(II)-SDW3-2 and qFe(II)-R/S3-1
	Gene ID	Position (bp) a	Annotation
	GRMZM2G034855	59004667-59009375	BAK5 - Brassinosteroid insensitive1-associated receptor kinase like 5
	GRMZM2G378547	59241519-59246165	PTI1 - Pto-interacting 1
	AC199526.5_FG003	59404935-59417148	CAF2 - Crs2 associated factor 2
	AC199526.5_FG002	59444036-59446493	S-adenosylmethionine synthetase family protein.
	GRMZM2G104394	59589071-59596715	POX1 - Guaiacol peroxidase1
	GRMZM2G314667	60060253-60060825	Unknown
	GRMZM2G118641	60151264-60172779	Protein serine / threonine kinases; protein tyrosine kinases; ATP binding;protein kinases.
	GRMZM2G113391	60360839-60370489	Craniofacial development-like protein
	GRMZM2G113495	60370739-60384767	Polyketide cyclase/dehydrase and lipid transport superfamily protein
	GRMZM2G462140	60384979-60394165	MTLPD1 - Mitochondrial lipoamide dehydrogenase 1
	GRMZM2G160958	60572633-60586540	Galactosyltransferase family protein
	GRMZM2G467435	60809615-60812630	Pectin lyase-like superfamily protein
	GRMZM2G165746	60812683-60818190	Mitochondrial substrate carrier family protein
	GRMZM2G117030	61090413-61094853	GDSL-like Lipase/Acylhydrolase superfamily protein
	GRMZM2G074517	61134848-61138119	GDSL-like Lipase/Acylhydrolase superfamily protein
	GRMZM2G174975	61204456-61207094	GDSL-like Lipase/Acylhydrolase superfamily protein
	GRMZM5G800558	61253423-61257839	ECHIDNA localizes to the TGN, and has been shown to function in the vacuolar sorting pathway of cell wall components, mucilage, and wax.
	GRMZM2G084694	61343156-61347003	INVAN10 - Invertase alkaline neutral 10
	GRMZM2G123815	61802375-61805791	SCPL33 - serine carboxypeptidase-like 33
	GRMZM2G091088	61902414..61905310	NB-ARC domain-containing disease resistance protein
	GRMZM2G087749	63169169-63170029	SMEK1 forms a catalytically active complex with PP4 proteins
	GRMZM2G038356	64104363-64106765	SAR1 - Secretion-associated Ras-related homolog1
	GRMZM2G081012	64104363-64106765	TBP-associated factor 13
	GRMZM5G835530	64546791-64561911	AMSH3 - Associated molecule with the SH3 domain of STAM 3
	GRMZM5G888428	64787088-64802823	Unknown
	GRMZM2G128171	65056094-65059412	PDI6 - Protein disulfide isomerase 6
	GRMZM2G017809	65321125-65321841	SP1L1 - SPIRAL1-like1
	GRMZM2G052616	65437301-65439479	GATA27 - C2C2-GATA-transcription factor 27
	GRMZM2G037209	65905977-65908091	Unknown
	GRMZM2G123428	66110224..66111374	Glycine-rich protein
	GRMZM2G014797	66353651-66354384	AASR7 - Abscisic acid stress ripening 7
	GRMZM2G314075	66350371-66350679	ASSR8 - Abscisic acid stress ripening 8
	GRMZM2G444029	66334576-66340928	Unknown
	GRMZM2G383699	66371398-66372066	AASR9 - Abscisic acid stress ripening9
	GRMZM5G885285	66466193-66473867	SEC15B - Exocyst complex component sec15B
	GRMZM2G088727	66779762-66787897	Chaperone DnaJ-domain superfamily protein
	GRMZM2G088653	66854506-66858602	ESDL1 - Early in short days-like 1
	GRMZM2G055458	66952614-66964635	TDPK1 - Thiamin diphosphokinase 1
	GRMZM2G095039	67401774-67402115	RALFL33 - Ralf-like 33
	GRMZM2G383154	67437748-67443136	Tetratricopeptide repeat (TPR)-containing protein
	GRMZM2G034896	67545006-67550838	Respiratory burst oxidase homolog B
	GRMZM2G104639	67630722-67636721	Unknown
	GRMZM2G031568	68382365..68388007	Esterase / lipase / thioesterase family protein
	GRMZM2G416322	68509364-68530707	S-locus lectin protein kinase family protein
	GRMZM2G164542	68579337-68580285	Unknown
	GRMZM2G017853	68615443-68635191	NAD(P)-binding Rossmann-fold superfamily protein
	GRMZM2G156251	68746016-68755105	Protein kinase superfamily protein
	GRMZM2G015277	68994376-69005332	CHR126b - Chromatin complex subunit A 126b
	GRMZM2G010085	68994376-69005332	CHR126b - Chromatin complex subunit A 126b
	GRMZM2G068947	70588889-70591236	OPR6 - 12-oxo-phytodienoic acid reductase6
	GRMZM2G001426	220172049-220173958	GRAS46 - GRAS-transcription factor 46
	GRMZM5G848857	71361300-71364659	Unknown
	GRMZM2G047919	72576065-72578785	Unknown
	GRMZM2G329944	73603207-73690100	Similar to mechanically sensitive ion channel identified in mouse
	GRMZM2G386281	74080276-74080756	Unknown
	GRMZM2G412848	74796480-74796945	Translation protein SH3-like family protein
	GRMZM2G384463	75131951..75133347	RPL16A - Ribosomal protein large subunit 16A
	GRMZM2G178319	77652770-77683216	Kinesin-like protein
	GRMZM2G168959	79602029-79636289	Met-10+ like family protein
	GRMZM2G027311	80772660-80820269	2-oxoglutarate (2OG) and Fe(II)-dependent oxygenase superfamily protein
	GRMZM2G100321	81179463-81223510	Cyclin family protein
	GRMZM2G156033	81735998-81748676	Chaperone DnaJ-domain superfamily protein
	GRMZM2G081380	83813928-83840797	Actin binding Calponin homology (CH) domain-containing protein
	GRMZM2G044724	114687383-114691564	ADR1-L1 - ADR1-like 1
	GRMZM2G180728	113652357-113655020	CYC17 - Cyclin1
	GRMZM2G086835	113589870-113590845	ZFP7 - Zinc finger protein 7
	GRMZM2G061629	113522335-113524279	SPT module subunit, interacts with HAG1
	GRMZM2G480380	113465957-113468437	PPR170 - Pentatricopeptide repeat protein170
	GRMZM2G480381	113452491-113467670	Tetratricopeptide repeat (TPR)-like superfamily protein
	GRMZM2G400223	113447240-113452090	Di-glucose binding protein with Kinesin motor domain
	GRMZM2G098957	113440225-113446147	Ribosomal protein L14p/L23e family protein
	GRMZM2G363503	112861718-112863663	Inorganic H pyrophosphatase family protein
	GRMZM2G009715	112547322-112553108	KEA3 - K+ efflux antiporter 3
	GRMZM2G009593	112526605-112536998	BRI1 suppressor 1 (BSU1)-like 2
	GRMZM2G349268	112323573-112325722	Core-2 / I-branching beta-1 6-N-acetylglucosaminyltransferase family protein
	GRMZM2G456669	111924126-111932993	Unknown
	GRMZM2G476933	111783142-111788891	MBD105 - Methyl binding domain105
	GRMZM2G078090	111600980-111605611	Structural maintenance of chromosomes flexible hinge domain protein
	GRMZM2G164418	111298358-111307483	UBP8 - Ubiquitin-specific protease 8
	GRMZM2G116646	110898396-110904944	YAB5 - C2C2-YABBY-transcription factor 5
	GRMZM2G105368	110387141-110390994	Unknown
	GRMZM2G135599	110296420-110299540	Integral membrane HRF1 family protein
	GRMZM2G119523	109878238-109882018	Unknown
	GRMZM2G046065	109659386-109668803	Translation initiation factor 3 (IF-3) family protein
	GRMZM2G077415	108966058-108971604	PMDH1 - Peroxisomal NAD-malate dehydrogenase 1
	GRMZM2G391794	108713154-108717327	Leucine-rich receptor-like protein kinase family protein
	GRMZM2G163059	107858636-107865281	OSCA6 - Hyperosmolality-gated calcium-permeable channels 6
	GRMZM2G403313	107623272..107624426	Unknown
	GRMZM2G110395	107319828-107322274	Core-2/I-branching beta-16-N-acetylglucosaminyltransferase family protein
	GRMZM2G018793	107115464-107117211	Alpha/beta-Hydrolases superfamily protein
	GRMZM2G018447	107095920-107113641	UCE6 - Ubiquitin conjugating enzyme 6
	GRMZM2G147857	106975310-106979154	Leucine-rich repeat protein kinase family protein
	GRMZM2G035520	106870646-106876953	MHA12 - Membrane H(+)-ATPase 12
	GRMZM2G106730	106502080-106504886	Nodulin-like / Major Facilitator Superfamily protein
	GRMZM2G062613	106344337-106347850	Catalytics
	GRMZM2G307561	105501727-105507931	SUT2 - Sucrose transporter2
	GRMZM2G307600	105501725-105503650	Metallo-hydrolase/oxidoreductase superfamily protein
	GRMZM2G017525	105012485-105016709	MAP70-2 - Microtubule-associated proteins 70-2
	GRMZM2G017835	105012485-105016709	Protein kinase family protein
	GRMZM2G147811	104403407-104411408	Protein kinase superfamily protein
	GRMZM2G047042	104016123-104032857	OEP37 - Chloroplast outer envelope protein 37
	GRMZM2G443240	103383572-103400198	RNI-like superfamily protein
	GRMZM2G109881	103383572-103400198	RNI-like superfamily protein
	GRMZM2G000076	102121898-102124846	Unknown
	GRMZM2G067223	101764613-101765764	E3 ubiquitin-protein ligase
	GRMZM2G074373	101432316-101440325	bZIP3 - bZIP-transcription factor 3
	GRMZM5G823484	100996314-101038978	SEC10 - Exocyst complex component sec 10
	GRMZM2G042855	100957123-100979301	Encodes a microtubule-associated protein
	GRMZM2G395853	100734735..100759561	Lojap-related protein
	GRMZM5G878970	100508916-100527246	Unknown
	GRMZM2G409893	87332397-87370383	Leucine-rich repeat protein kinase family protein
	GRMZM2G045816	89264647-89270023	Unknown
	GRMZM2G045714	89270254-89277498	Alpha/beta-Hydrolases superfamily protein
	GRMZM2G145201	89762557-89796331	RDR6 - RNA-dependent RNA polymerase 6
	GRMZM2G125832	91031177-91034784	AAAP15 - Amino acid/auxin permease 15
	GRMZM2G005516	93332587-93333329	TUB6 - beta-6 tubulin
	GRMZM2G014805	93572280-93589183	UBP12 - Ubiquitin-specific protease 12
	GRMZM2G016457	93627293-93658930	Unknown
	GRMZM2G008123	94207187-94207729	Protein with RING/U-box and TRAF-like domains
	AC198518.3_FG003	94601625-94613451	Mediator of RNA polymerase II transcription subunit-like protein
	GRMZM2G352159	94801561-94808087	ARF8 - ARF-transcription factor 8
	GRMZM2G404132	95299802-95304791	(KIPK) KCBP-interacting protein kinase
	GRMZM5G867767	95569784-95579735	Encodes a nucleoporin involved in mRNA export from the nucleus
	GRMZM5G826456	95569784-95579735	Unknown
	GRMZM2G149330	95582181-95611083	Unknown
	GRMZM2G319465	95998349-96065324	Unknown
	GRMZM2G009464	96353827-96357619	ABC transporter family protein
	GRMZM2G073049	96534438-96564794	RGLG2 - RING domain ligase 2
	GRMZM2G061732	96790270-96791057	Quinolinate synthase
	GRMZM5G874082	97373742-97406071	P-loop containing nucleoside triphosphate hydrolases superfamily protein
	GRMZM2G343974	97373742-97406071	GLP1 - Germin-like protein 1
	AC225185.3_FG004	97842987-97847277	Unknown
	GRMZM2G004468	98230565-98231242	MKK3 - MAP kinase kinase 3
	GRMZM2G033521	98521165-98526317	ARM repeat superfamily protein
	GRMZM2G411536	98733038-98750352	UPL3 - Ubiquitin-protein ligase 3
	GRMZM2G135322	99015105-99039167	Peptidase C78 ubiquitin fold modifier-specific peptidase 1/ 2
	GRMZM2G063306	99216253-99223276	ZmYS3 - Yellow stripe 3
	GRMZM2G086882	99372009-99380889	ADK1 - Adenylate kinase 1
	GRMZM2G047637	114823164-114825442	CYC22 - Cyclin22
	GRMZM2G362306	114957924-114962963	Adenine nucleotide alpha hydrolases-like superfamily protein
	GRMZM2G093347	115013661-115017221	APT1 - Adenine phosphoribosyl transferase 1
	GRMZM2G026203	115461083-115467444	RLK902 - Receptor-like kinase 902
	GRMZM2G028665	115530858-115534811	Wound-responsive family protein
	GRMZM2G105991	115806978-115812646	UGT88A1 - UDP-glucosyl transferase 88A1
	GRMZM2G069886	115888038-115897303	Histone acetyltransferase of the CBP family 1
	GRMZM2G059703	116220452-116222856	Unknown
	GRMZM2G368126	116229650-116231559	Transducin/WD40 repeat-like superfamily protein
	GRMZM2G176282	116320098-116328217	EXS (ERD1/XPR1/SYG1) family protein
	GRMZM2G457411	116433932-116436949	RING/U-box superfamily protein
	GRMZM2G173424	116785121-116812850	CBL2 - Calcineurin B-like 2
	GRMZM2G145300	117150933-117178076	TRAF-like superfamily protein
	GRMZM2G173680	117426714-117429766	WRKY110 - WRKY-transcription factor 110
	GRMZM2G053692	117754312-117760827	Coatomer epsilon subunit
	GRMZM2G157873	118296219-118297253	PMEI22 - Pectin methylesterase inhibitor 22
	GRMZM2G116574	118386447-118397289	DREB2A-interacting protein 2
	GRMZM2G069758	118481424..118482104	PFKB-like carbohydrate kinase family protein
	GRMZM2G022629	118677293-118679137	Unknown
	GRMZM2G441768	119018519-119024730	RNI-like superfamily protein
	GRMZM2G035338	119115186-119128673	P-loop containing nucleoside triphosphate hydrolases superfamily protein
	GRMZM2G138268	119198456-119203131	IAA10 - Aux/IAA-transcription factor 10
	GRMZM2G167794	119458131-119459790	IAA11 - Aux/IAA-transcription factor 11
	GRMZM2G075900	119558445-119568782	Inorganic H pyrophosphatase family protein
	GRMZM2G444621	120297185-120298044	CML11 - Calmodulin-like 11
	GRMZM5G800764	120488562-120489635	Unknown
	GRMZM2G390374	120904695-120930583	Root hair defective 3 GTP-binding protein (RHD3)
	a The position refers to the B73 reference sequence Version 5.

## Sheet: Table S5
	TABLE S5 Information of the genes within the QTL-colocalization of qFe(III)-RDW5-1, qFe(II)-PH5-1 and qFe(II)-RDW5-1
	Gene ID	Position (bp) a	Annotation
	GRMZM2G105460	178918453-178920082	RING/U-box superfamily protein
	GRMZM2G404769	178942368-178950347	PAP28 - purple acid phosphatase28
	GRMZM2G176358	178953365-178957527	Histone superfamily protein
	GRMZM2G023988	178989105-178994336	CCHH3 - Cys2His2 Zinc Finger 3
	GRMZM2G024739	179032795-179036811	CRY1 - Cryptochrome1
	GRMZM2G025236	179031212-179052795	Nucleotide-sugar transporter family protein
	GRMZM2G072146	179164696-179170000	UBP3 - Ubiquitin-specific protease 3
	GRMZM2G049372	179313911-179337307	Major facilitator superfamily protein
	GRMZM5G839593	179343669-179353536	Major facilitator superfamily protein
	GRMZM2G040481	179420089-179421135	EIL8 - EIL-transcription factor 8
	GRMZM2G040511	179425397-179436507	ABC2 homolog 13
	GRMZM2G115420	179525213-179531153	SERK2 - Somatic embryogenesis receptor-like kinase2
	GRMZM2G056629	179660421-179662563	Galactose mutarotase-like superfamily protein
	GRMZM2G075637	179698705-179702862	NFA104 - Nucleosome / chromatin assembly factor A104
	GRMZM2G081589	179750537-179753838	SUT5 - Sucrose transporter5
	GRMZM2G156734	179900253-179904013	RING/FYVE/PHD zinc finger superfamily protein
	GRMZM2G129929	180184379-180185465	Unknown
	GRMZM2G325683	180188882-180189220	Unknown
	GRMZM2G325693	180194207..180195234	Unknown
	GRMZM2G027193	180213185-180216902	Unknown
	GRMZM2G099989	180454532-180456030	Unknown
	GRMZM2G492156	180536741-180547843	MADS19 - MADS-transcription factor 19
	GRMZM2G103152	180765220-180773609	GTP cyclohydrolase II
	GRMZM5G801651	180977997-180983559	Plasma-membrane choline transporter family protein
	GRMZM5G896337	180977997-180983559	Plasma-membrane choline transporter family protein
	GRMZM2G459166	180984069-180986763	F-box protein that is involved in GA signaling
	GRMZM5G861269	181062784-181066300	Dynein light chain type 1 family protein
	GRMZM2G410710	181141455-181144419	PHB3 - Prohibitin3
	GRMZM2G176382	181146858-181153332	Unknown
	GRMZM2G176253	181157650-181161252	NPF9 - Nitrate transporter / peptide transporter family 9
	GRMZM2G095782	181371080-181377861	Pseudouridine synthase family protein
	GRMZM5G884270	181396709-181420098	Transferases; Sulfuric ester hydrolases; Catalytics; Transferases
	GRMZM2G444643	181449899-181455394	TLC11 - TRAM / LAG / CRN8 11
	GRMZM2G433002	181576489-181581218	Magnesium ion binding; Thiamin pyrophosphate binding; Hydro-lyases; Catalytics; 2-succinyl-5-enolpyruvyl-6-hydroxy-3-cyclohexene-1-carboxylic-acid synthases
	GRMZM2G131727	181583458-181587804	18S pre-ribosomal assembly protein gar2-related
	GRMZM2G060355	181603470-181608015	Intracellular protein transporter
	GRMZM2G106412	181661305-181665677	Period circadian protein
	GRMZM2G443180	181693030-181694190	Unknown
	GRMZM2G083855	181850341-181851316	Unknown
	GRMZM2G160710	182065648-182066369	Heavy metal transport / detoxification superfamily protein
	GRMZM2G024693	182316844-182326317	RAB GTPase homolog B1C
	GRMZM2G101605	182422569-182423402	Unknown
	GRMZM2G101547	182418548-182421968	Tetratricopeptide repeat (TPR)-like superfamily protein
	GRMZM2G101523	182412965-182418347	Phosphoinositide binding
	GRMZM2G101519	182351954-182354134	Bromodomain and extraterminal domain protein 10
	GRMZM2G109959	182447634-182448435	Glycine-rich protein family
	GRMZM2G122276	182466419-182467299	Unknown
	GRMZM2G013324	182533018-182538114	gpx11 - glycerophosphodiester phosphodiesterase11
	GRMZM2G095144	182546067-182547073	PTB domain engulfment adapter
	GRMZM2G172900	182674722-182678785	NIMA-related kinase 5
	GRMZM2G089517	182724020-182726473	UV-B-insensitive 4-like
	GRMZM2G352274	182797262-182800116	UV-B-insensitive 4
	GRMZM2G113064	182800555-182815819	Transducin/WD40 repeat-like superfamily protein
	GRMZM2G003384	182952233-182954367	Ribosomal protein L6 family protein
	GRMZM2G168176	183092134-183096215	Ribosomal RNA processing Brix domain protein
	GRMZM2G051079	183132228-183140887	Protein kinase superfamily protein
	GRMZM2G159660	183228292-183234228	Calcineurin-like metallo-phosphoesterase superfamily protein
	GRMZM2G091176	183441650-183444276	UDP-glucosyl transferase 73B5
	GRMZM2G057184	183513107-183517150	ARM-repeat/Tetratricopeptide repeat (TPR)-like protein
	GRMZM2G092780	183585636-183588971	PHT2;1 - Phosphate transporter 2;1.
	GRMZM2G092743	183589593-183590362	Transcription termination factor
	GRMZM2G092672	183590493-183592940	Plant intracellular ras group-related LRR 1
	GRMZM2G092447	183594216-183599403	NBR1a - Next to brca1a-like
	GRMZM2G044359	183851448-183854256	Phototropic-responsive NPH3 family protein
	GRMZM2G038073	184047545-184051104	NACTF13 - NAC-transcription factor 13
	GRMZM2G079682	184082583-184085590	Beta-1 4-N-acetylglucosaminyltransferase family protein
	GRMZM2G029922	184110138-184113407	Cryptic loci regulator
	GRMZM2G116872	184252880-184259391	IDH-III - Isocitrate dehydrogenase III
	GRMZM2G026085	184245610-184246468	Coiled-coil protein
	GRMZM2G106061	184369634-184371362	RAB GTPase homolog E1B
	GRMZM2G139614	184406912-184411043	EIF4B1 - Eukaryotic translation initiation factor 4B1
	GRMZM2G179308	184437443-184440856	FUS3-complementing gene 2
	GRMZM2G399952	184513162-184528816	Rhodanese/Cell cycle control phosphatase superfamily protein
	GRMZM2G101274	184528406-184533432	Vacuolar protein sorting-associated protein 20.2
	GRMZM2G121115	184610205-184613694	BTB and TAZ domain protein 2
	GRMZM2G121166	184616864-184620576	Global repressor of RNA polymerase III
	AC205703.4_FG002	184714866-184724516	Actin-like ATPase superfamily protein
	AC205703.4_FG001	184727568-184729833	Ubiquitin-like superfamily protein
	AC205703.4_FG005	184906370-184911103	Transmembrane protein
	AC205703.4_FG006	184911285-184914251	GL8 - Glossy 8
	GRMZM5G834874	184915352-184920478	ABI35 - ABI3-VP1-transcription factor 35
	AC205703.4_FG010	184920647-184928482	Encodes a novel protein that co-immunoprecipitates with SYP41
	GRMZM2G144166	184928554-184936131	TEL2 - Telomere maintenance2
	GRMZM2G029583	185112989-185116457	26S proteasome regulatory subunit Rpn7; Proteasome component (PCI) domain
	GRMZM2G030606	185116750-185118686	Multidrug resistance protein
	GRMZM2G031107	185119700-185125673	Glucose-6-phosphate dehydrogenase 6
	GRMZM2G031496	185126125-185129192	NBP35 - Nuclear binding protein35
	GRMZM2G176307	185247242-185252030	GPC4 - Glyceraldehyde-3-phosphate dehydrogenase4
	GRMZM2G308189	185309774-185311399	Tetratricopeptide repeat (TPR)-like superfamily protein
	GRMZM2G006707	185360883-185368524	GTE102 - Global transcription factor group E
	GRMZM2G115755	185524232-185528212	Protein kinase superfamily protein
	GRMZM2G408012	185553098-185554266	GRAS39 - GRAS-transcription factor 39
	GRMZM2G024550	185610577-185613422	mTERF17 - mTERF domain protein 17
	GRMZM2G024451	185613447-185616855	Pre-mRNA-splicing factor ISY1-like protein
	GRMZM2G005229	185731298..185734190	Unknown
	GRMZM2G137409	185840084-185846530	LW2 - Lemon white 2
	GRMZM2G137399	185849839-185851610	GDSL-like Lipase / Acylhydrolase superfamily protein
	GRMZM2G137375	185854789-185857517	Unknown
	GRMZM2G001033	185903869-185909619	UTR6 - UDP-galactose transporter 6
	GRMZM2G128880	185960466-185964089	NIC1 - Nicotinamidase 1
	GRMZM2G128902	185965678-185969476	Unknown
	GRMZM2G095299	186158120-186159810	DBB6 - Double B-box zinc finger protein6
	GRMZM2G095194	186172195-186178168	Eukaryotic translation initiation factor eIF2A family protein
	GRMZM2G095147	186178452-186183724	Nucleusenvelope protein
	GRMZM2G129189	186238039-186239256	EPR4 - Endochitinase precursor4
	GRMZM2G028096	186253761-186260269	LUC7 related protein
	GRMZM2G001097	186296224-186298585	TRAF-like superfamily protein
	GRMZM2G117108	186482474..186489244	FARL8 - FAR1-like-transcription factor 8
	GRMZM2G106653	186655540..186664591	FARL9 - FAR1-like-transcription factor 9
	GRMZM2G106680	186666266-186696435	LETM1-like protein
	GRMZM2G314656	186666266-186696435	LETM1-like protein
	GRMZM2G007466	186881618-186883620	Integrin-linked protein kinase family
	a The position refers to the B73 reference sequence Version 5.
